# Supplementary material for: Electrospun Ta-doped TiO2/C nanofibers as a high-capacity and long-cycling anode material for Li-ion and K-ion batteries
Source: Royal Society of Chemistry journal article supplement (doi:10.1039/d0ta06327d), 2020-01-01
Supplement: d0ta06327d1.pdf [file d0ta06327d1.pdf]

**Supporting information of**  
**Electrospun Ta-doped TiO<sub>2</sub>/C Nanofibers as High-Capacity and**  
**Long-Cycling Anode Materials for Li-ion and K-ion Batteries**

Die Su <sup>1</sup>, Li Liu <sup>1\*</sup>, Zhixiao Liu <sup>2\*</sup>, Jing Dai <sup>1</sup>, Jiaxing Wen <sup>1</sup>, Min Yang <sup>1</sup>, Sidra Jamil  
<sup>1</sup>, Huiqiu Deng <sup>3</sup>, Guozhong Cao <sup>4\*</sup>, Xianyou Wang <sup>1</sup>

<sup>1</sup>National Base for International Science & Technology Cooperation, National Local Joint Engineering Laboratory for Key materials of New Energy Storage Battery, Hunan Province Key Laboratory of Electrochemical Energy Storage and Conversion, School of Chemistry, Xiangtan University, Xiangtan 411105, China

<sup>2</sup>College of Materials Science and Engineering, Hunan University, Changsha 410082, China

<sup>3</sup>School of Physics and Electronics, Hunan University, Changsha 410082, China

<sup>4</sup>Department of Materials Science and Engineering, University of Washington, Seattle, WA 98195-2120, United States

---

\* Corresponding author. E-mail: [liulili1203@126.com](mailto:liulili1203@126.com) (L. Liu); [zxliu@hnu.edu.cn](mailto:zxliu@hnu.edu.cn) (Z. Liu); [gzcao@uw.edu](mailto:gzcao@uw.edu) (G. Cao)

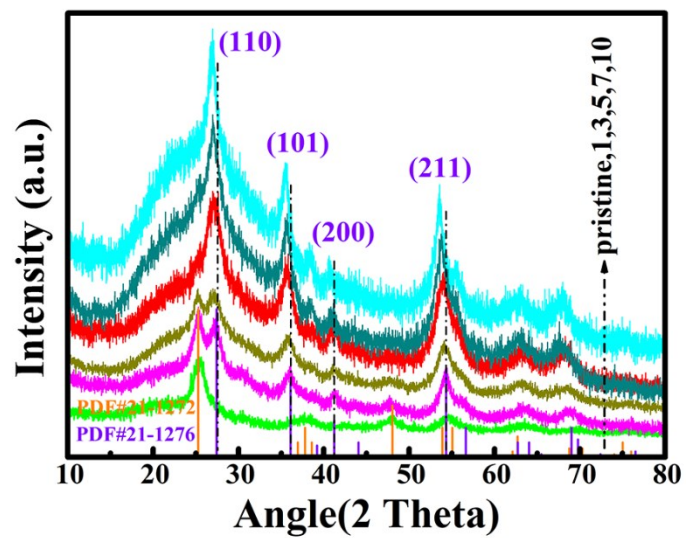

**Fig. S1** XRD patterns of TiO<sub>2</sub>-pristine/CNF and of Ta-doped TiO<sub>2</sub>/C NFs with 1%, 3%, 5%, 7%, and 10% doping amounts.

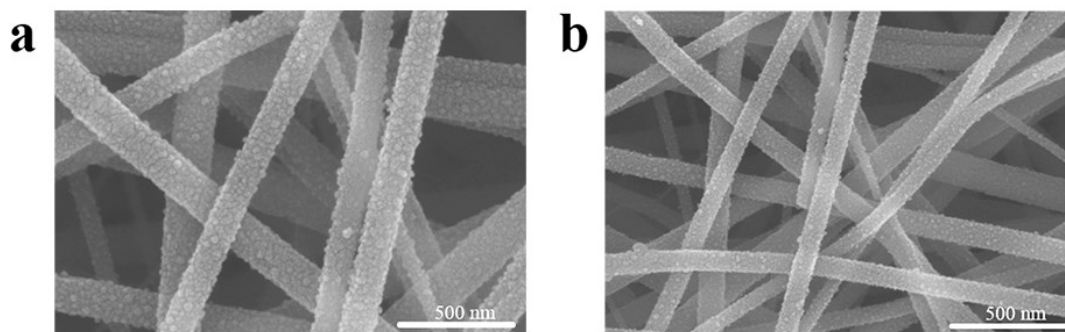

**Fig. S2** FE-SEM of (a) precursor nanofibers for TiO<sub>2</sub>-pristine/CNF and (b) TiO<sub>2</sub>-pristine/CNF.

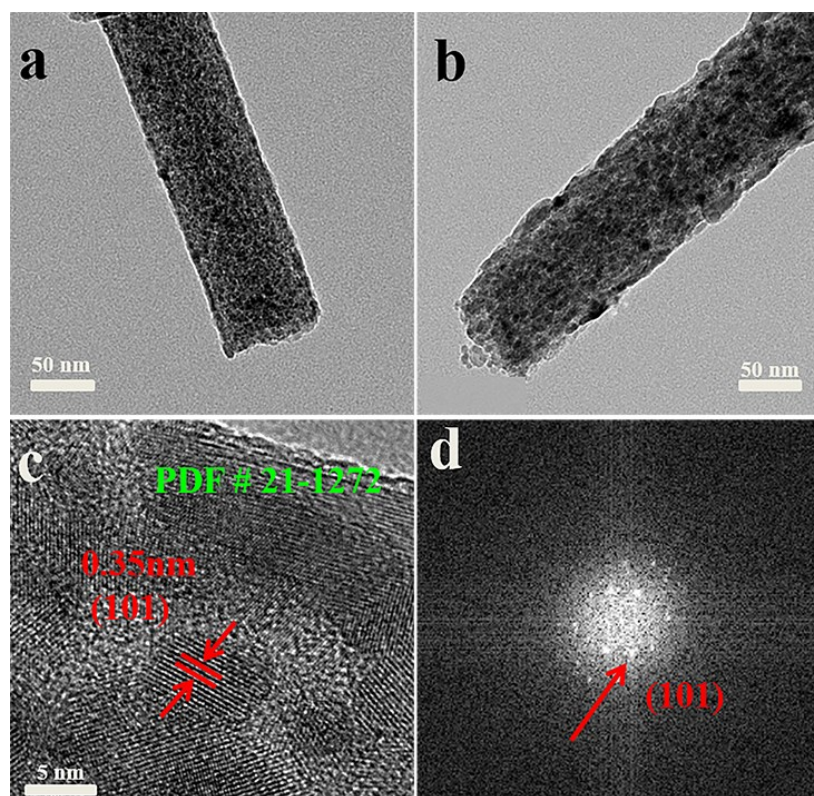

**Fig. S3** (a, b) FE-TEM images, (c) HRTEM image and (d) FFT pattern of TiO<sub>2</sub>-pristine/CNF.

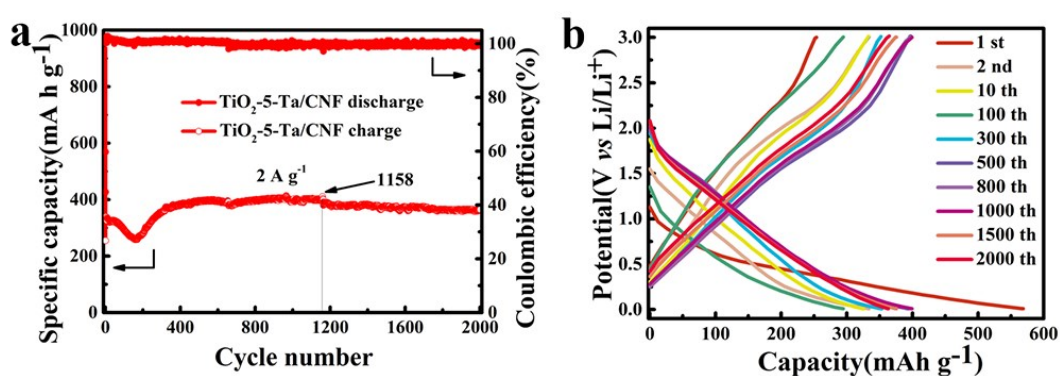

**Fig. S4** The Li-metal half cell of TiO<sub>2</sub>-5-Ta/CNF for 2000 cycles: (a) cycle performance at 2 A g<sup>-1</sup> and (b) corresponding CDC.

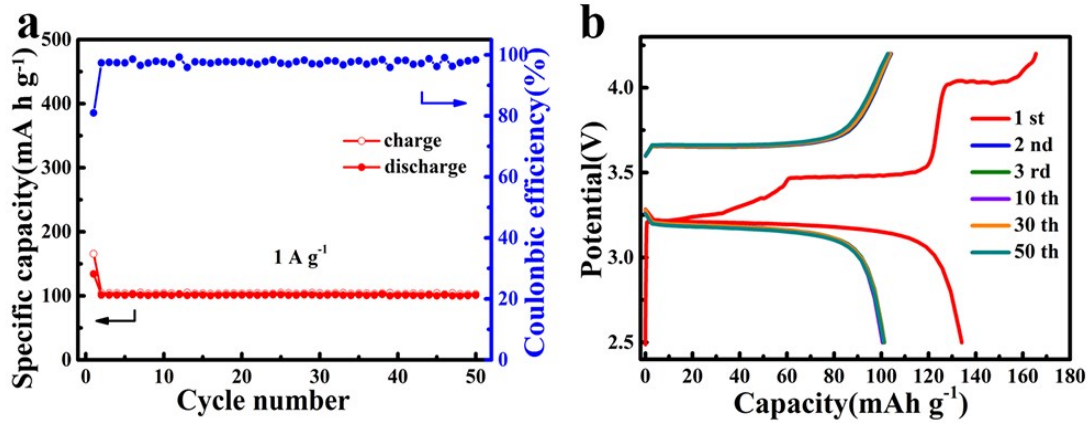

**Fig. S5** (a) The cycling performance and (b) corresponding CDC of LFP electrode at  $1 \text{ A g}^{-1}$  in Li-metal half cell.

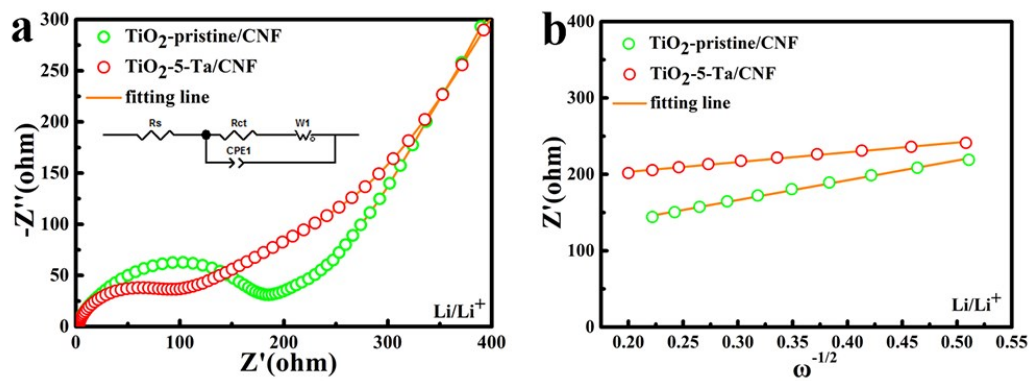

**Fig. S6** (a) A.C. impedance of  $\text{TiO}_2$ -pristine/CNF electrode and  $\text{TiO}_2$ -5-Ta/CNF electrode at  $50 \text{ mA g}^{-1}$  after the first cycle in Li-metal half cells (the inset part is the equivalent circuit model), (b) The relationship plot between  $Z'$  and  $\omega^{-1/2}$  at low frequency region.

**Table S1** Simulated impedance parameters of the TiO<sub>2</sub>-pristine/CNF and the TiO<sub>2</sub>-5-Ta/CNF in Li-metal half cells.

| Samples                        | $R_s$ ( $\Omega$ ) | $R_{ct}$ ( $\Omega$ ) | $i_0$ (mA cm <sup>-2</sup> ) | $\delta_w$ ( $\Omega$ s <sup>-1/2</sup> ) | $D_{Li^+}$ (cm <sup>-2</sup> s <sup>-1</sup> ) |
|--------------------------------|--------------------|-----------------------|------------------------------|-------------------------------------------|------------------------------------------------|
| TiO <sub>2</sub> -pristine/CNF | 2.6                | 155                   | 0.16                         | 243.1                                     | $1.2 \times 10^{-14}$                          |
| TiO <sub>2</sub> -5-Ta/CNF     | 2.2                | 68                    | 0.37                         | 127.7                                     | $4.3 \times 10^{-14}$                          |

**Table S2** The electrochemical performance comparison of TiO<sub>2</sub>-5-Ta/CNF with other reported rutile TiO<sub>2</sub> anodes in Li-metal half cells in recent five years.

| Samples                                                          | A: B: C *<br>(wt. %) | Current<br>density(<br>mA g <sup>-1</sup> ) | Capacity<br>(mA h g <sup>-1</sup> )    | Voltage range<br>(V) | Reference                                            |
|------------------------------------------------------------------|----------------------|---------------------------------------------|----------------------------------------|----------------------|------------------------------------------------------|
| Nb-doped TiO <sub>2</sub><br>nanorods                            | 70: 20: 10           | 250                                         | 290 after<br>120 cycles                | 0.05-3.0             | 10.1016/j.solidst<br>atesciences.2018.<br>07.004[25] |
| Nano-Sn doped<br>carbon-coated TiO <sub>2</sub><br>spheres       | 80: 10: 10           | 500                                         | 219 after<br>200 cycles                | 0.01-3.0             | 10.1039/c6ra046<br>72j[15]                           |
| 3D mesoporous N-<br>doped carbon-<br>assembling TiO <sub>2</sub> | 80: 10: 10           | 168                                         | 223 after<br>200 cycles                | 0.01-3.0             | 10.1016/j.jpowsou<br>r.2019.02.094[5<br>2]           |
| Mesostructured Nb-<br>TiO <sub>2</sub> -C                        | 70: 20: 10           | 670                                         | 79 after<br>500 cycles                 | 0.01-2.5             | 10.1016/j.jpowsou<br>r.2017.12.055[5<br>3]           |
| Nb-doped TiO <sub>2</sub><br>mesocrystals                        | 70: 20: 10           | 840                                         | 140 after<br>600 cycles                | 1.0-3.0              | 10.1002/chem.20<br>1605115[54]                       |
| SnO <sub>2</sub> /TiO <sub>2</sub> /C quasi-<br>nanospheres      | 80: 10: 10           | 200                                         | 642.5 after<br>450 cycles              | 0.01-3.0             | 10.1016/j.matlet.<br>2018.06.062[55]                 |
| Sn-doped TiO <sub>2</sub> hollow<br>nanocrystals                 | 80:10:10             | 5000                                        | 110 after<br>500 cycles                | 0.01-3.0             | 10.1021/acsomeg<br>a.7b01340[1]                      |
| The core-shell<br>mesoporous TiO <sub>2</sub> N-<br>doped C      | 80:10:10             | 20,000                                      | 172.2 after<br>500 cycles              | 0.05-3.0             | 10.1016/j.jallco<br>m.2019.07.225[5<br>6]            |
| <b>TiO<sub>2</sub>-5-Ta/CNF</b>                                  | <b>70:20:10</b>      | <b>2000</b>                                 | <b>399.3<br/>after 1000<br/>cycles</b> | 0.01-3.0             | <b>This work</b>                                     |

\*A: B: C = active materials: binder: conductive additive

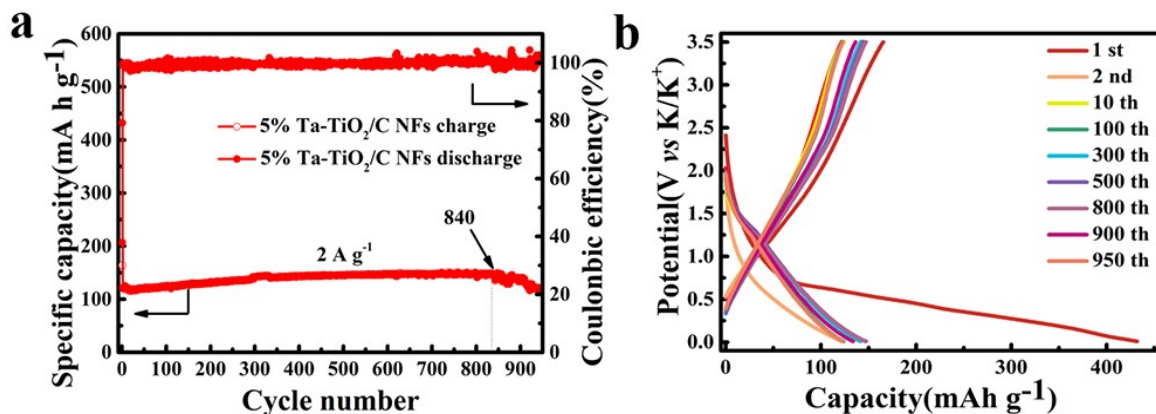

**Fig. S7** The K-metal half cell of  $\text{TiO}_2\text{-5-Ta/CNF}$  for 950 cycles: (a) cycle performance at  $2 \text{ A g}^{-1}$  and (b) corresponding CDC.

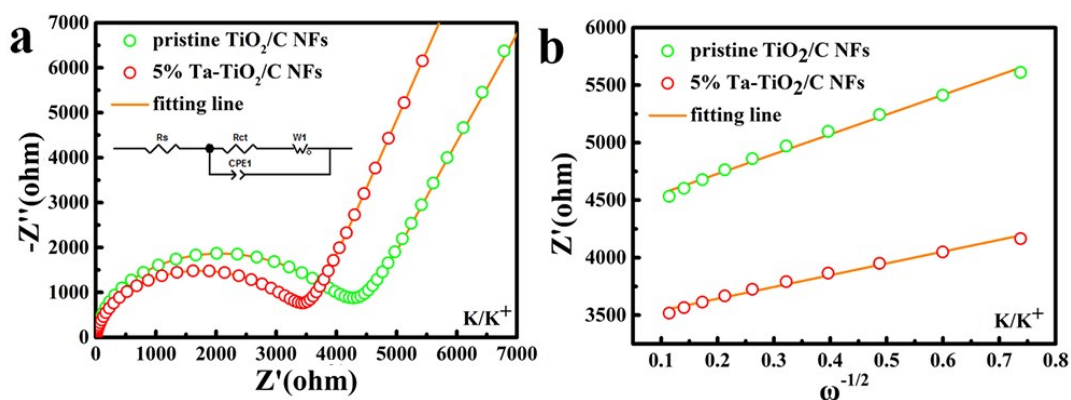

**Fig. S8** (a) A. C. impedance of  $\text{TiO}_2\text{-pristine/CNF}$  electrode and  $\text{TiO}_2\text{-5-Ta/CNF}$  electrode at  $50 \text{ mA g}^{-1}$  after the first cycle in K-metal half cells (the inset part is the equivalent circuit model), (b) The relationship plot between  $Z'$  and  $\omega^{-1/2}$  at low frequency region.

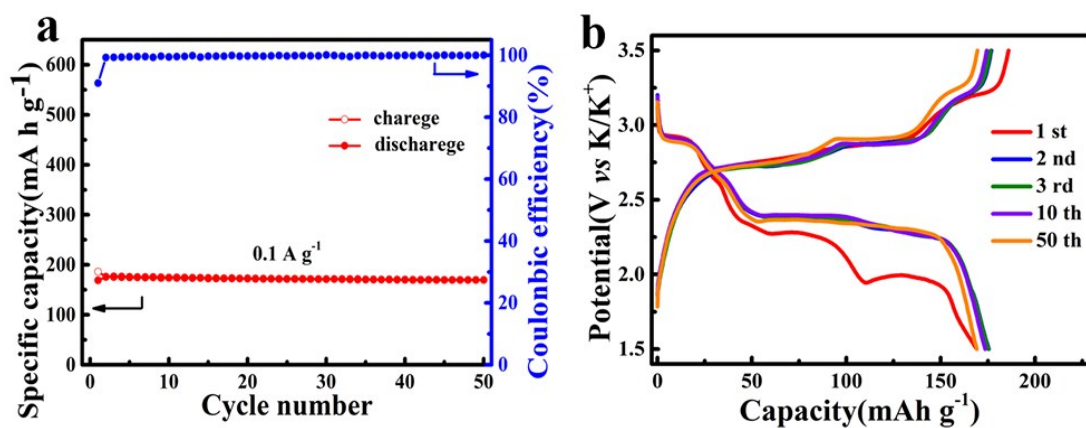

**Fig. S9** (a) The cycling performance and (b) corresponding CDC of PTCDA electrode at 0.1 A g<sup>-1</sup> in K-metal half cell.

**Table S3** Simulated impedance parameters of the TiO<sub>2</sub>-pristine/CNF and TiO<sub>2</sub>-5-Ta/CNF in K-metal half cells.

| Samples                        | $R_s$ ( $\Omega$ ) | $R_{ct}$ ( $\Omega$ ) | $i_0$ ( $\times 10^{-3}$ mA cm <sup>-2</sup> ) | $\delta_w$ ( $\Omega$ s <sup>-1/2</sup> ) | $D_{K^+}$ (cm <sup>2</sup> s <sup>-1</sup> ) |
|--------------------------------|--------------------|-----------------------|------------------------------------------------|-------------------------------------------|----------------------------------------------|
| TiO <sub>2</sub> -pristine/CNF | 3.8                | 3670                  | 6.9                                            | 1716                                      | $2.4 \times 10^{-16}$                        |
| TiO <sub>2</sub> -5-Ta/CNF     | 2.9                | 3100                  | 8.3                                            | 1024                                      | $6.7 \times 10^{-16}$                        |



**Table S4** The electrochemical performance comparison of TiO<sub>2</sub>-5-Ta/CNF with other reported Ti-based oxides in K-metal half cells.

| Samples                                                                                  | A: B: C*<br>(wt. %)            | Current<br>density<br>(mA g <sup>-1</sup> ) | Capacity<br>(mAh g <sup>-1</sup> ) | Voltage<br>range (V) | Reference                                 |
|------------------------------------------------------------------------------------------|--------------------------------|---------------------------------------------|------------------------------------|----------------------|-------------------------------------------|
| Lepidocrocite-Type<br>Layered TiO <sub>2</sub>                                           | 80: 10: 10                     | 25                                          | 37 after 45<br>cycles              | 0.01-2.0             | 10.1021/acsaem.8b00170<br>[30]            |
| Ti <sub>6</sub> O <sub>11</sub> /CNT                                                     | 80: 10: 10                     | 200                                         | 80 after 500<br>cycles             | 0.01-2.5             | 10.1021/acsomega.9b00045<br>[57]          |
| K <sub>2</sub> Ti <sub>4</sub> O <sub>9</sub>                                            | 75:20:10                       | 100                                         | 45 after 30<br>cycles              | 0.01-2.5             | 10.1149/2.042<br>1613jes [58]             |
| K <sub>2</sub> Ti <sub>6</sub> O <sub>13</sub> nanorods                                  | 70: 20: 10                     | 100                                         | 83 after 50<br>cycles              | 0.01-3.0             | 10.1016/j.jelechem.2019.04.0<br>20 [59]   |
| K <sub>2</sub> Ti <sub>8</sub> O <sub>17</sub>                                           | 70: 20: 10                     | 20                                          | 110.7 after<br>50 cycles           | 0.01-3.0             | 10.1039/C6CC<br>05102B [60]               |
| KTiOPO <sub>4</sub> /C                                                                   | 80:10:10                       | 5                                           | 90 after 50<br>cycles              | 0.01-2.0             | 10.1002/anie.2<br>01909202[61]            |
| MXene-derived<br>TiO <sub>2</sub> /RGO                                                   | 80: 10: 10                     | 1000                                        | 88 after<br>1000 cycles            | 0.01-3.0             | 10.1039/C8TA<br>12069B [31]               |
| K <sub>2</sub> Ti <sub>6</sub> O <sub>13</sub><br>microscaffolds                         | 80: 10: 10                     | 500                                         | 40 after<br>1000 cycles            | 0.01-3.5             | 10.1021/acsam<br>i.7b15314 [62]           |
| K <sub>2</sub> Ti <sub>2</sub> O <sub>5</sub> @C                                         | 80: 10: 10                     | 16                                          | 75 after<br>1000 cycles            | 0.01-3.0             | 10.1002/sml.2<br>01906131 [63]            |
| LiBaF <sub>3</sub> modified Zr-<br>doped Li <sub>4</sub> Ti <sub>5</sub> O <sub>12</sub> | 70: 20: 10                     | 850                                         | 96 after<br>1000 cycles            | 0.01-2.5             | 10.1002/asia.2<br>01900873[64]            |
| Na <sub>2</sub> Ti <sub>3</sub> O <sub>7</sub> /N doped C                                | 70: 20: 10                     | 100                                         | 88.9 after<br>1555 cycles          | 0.01-2.5             | 10.1021/acsam<br>i.8b11354[65]            |
| Hierarchical TiO <sub>2</sub> -C<br>micro-tubes                                          | super P and<br>CMC in<br>water | 500                                         | 132.8 after<br>1200 cycles         | 0.01-3.0             | 10.1016/j.nano<br>en.2019.03.00<br>2 [29] |

|                                 |                 |             |                                   |          |                  |
|---------------------------------|-----------------|-------------|-----------------------------------|----------|------------------|
| <b>TiO<sub>2</sub>-5-Ta/CNF</b> | <b>70:20:10</b> | <b>2000</b> | <b>148.8 after<br/>800 cycles</b> | 0.01-3.5 | <b>This work</b> |
|---------------------------------|-----------------|-------------|-----------------------------------|----------|------------------|

---

\* A: B: C = active materials: binder: conductive additive
